# Supplementary material for: Buckwheat and buckwheat enriched products exert an anti-inflammatory effect on the myofibroblasts of colon CCD-18Co
Source: Royal Society of Chemistry journal article supplement (doi:10.1039/c8fo00193f), 2018-01-01
Supplement: c8fo00193f3.pdf [file c8fo00193f3.pdf]

Supplementary Table 1. BW-enhanced wheat breads formulation and baking conditions

| Ingredient and conditions        | BW-enhanced dark               | BW-enhanced white                 |
|----------------------------------|--------------------------------|-----------------------------------|
|                                  | wheat bread ( <sub>b</sub> BW) | wheat bread ( <sub>b500</sub> BW) |
| Dark wheat flour type 2000 (g)   | 175                            | -                                 |
| White wheat flour type 500 (g)   | -                              | 175                               |
| Water (mL)                       | 228                            | 250                               |
| BW flour from roasted groats (g) | 175*                           |                                   |
| Salt (g)                         | 3.5*                           |                                   |
| Yeast (g)                        | 10.5*                          |                                   |
| Fermentation                     |                                |                                   |
| Temperature (°C)                 | 37*                            |                                   |
| Time (min)                       | 90*                            |                                   |
| Pieces of dough (g)              | 250*                           |                                   |
| Proofing (75% rh)                |                                |                                   |
| Temperature (°C)                 | 37*                            |                                   |
| Time (min)                       | 25*                            |                                   |
| Baking:                          |                                |                                   |
| Temperature (°C)                 | 250*                           |                                   |
| Time (min)                       | 30*                            |                                   |

\* Conditions applied for the elaboration of <sub>b</sub>BW and <sub>b500</sub>BW
