# Supplementary material for: Buckwheat and buckwheat enriched products exert an anti-inflammatory effect on the myofibroblasts of colon CCD-18Co
Source: Royal Society of Chemistry journal article supplement (doi:10.1039/c8fo00193f), 2018-01-01
Supplement: c8fo00193f4.pdf [file c8fo00193f4.pdf]

Supplementary Figure S2.

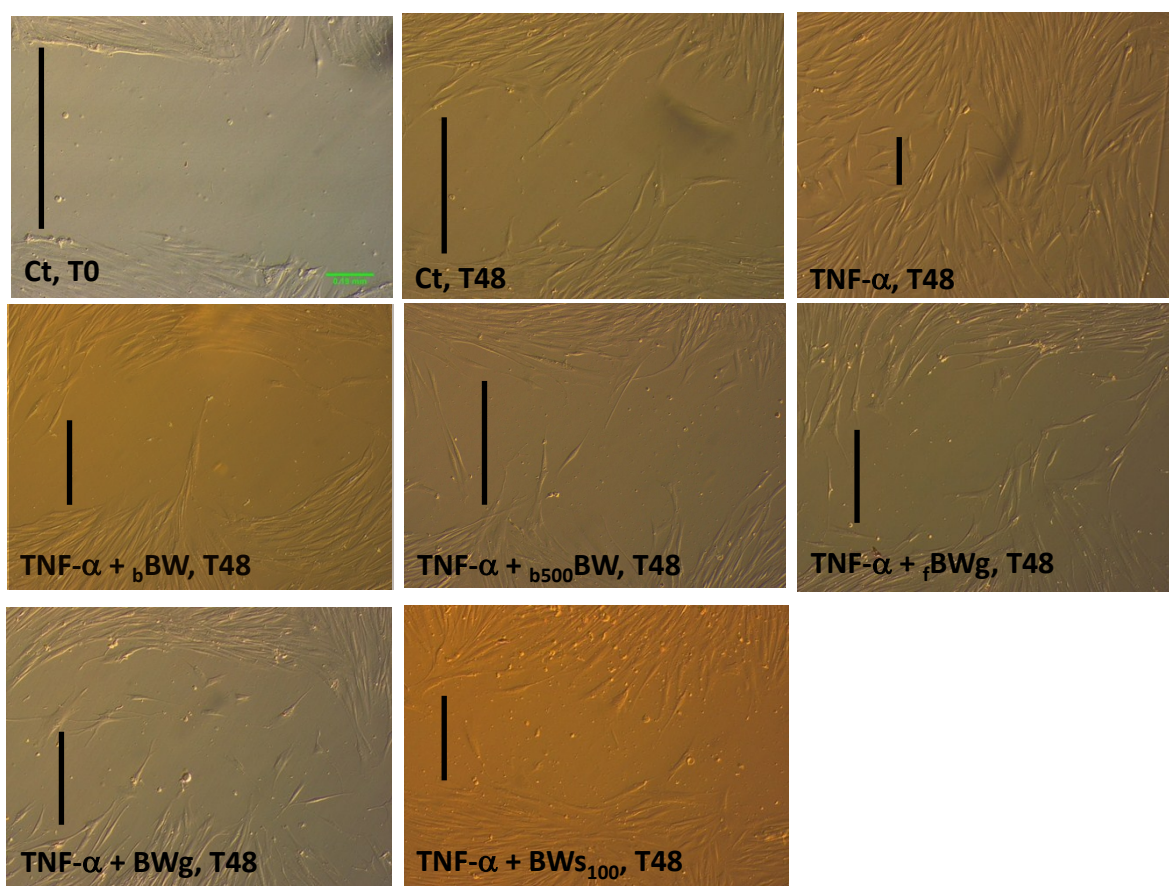

Supplementary Figure S2. Representative images showing the effect of the different BW products on TNF- $\alpha$ -induced migration in myofibroblasts of colon CCD-18Co after 48 h of treatment. The cells were co-treated with 20 ng/mL TNF- $\alpha$  together with BW-enhanced breads ( $b$ BW and  $b_{500}$ BW), fermented and non-fermented BW groats ( $f$ BWg and BWg) and BW sprouts (BWS<sub>100</sub>). Vertical black lines indicate manual trace from the top to the bottom of the wound.
